# Supplementary material
Source: publisher site journal article supplement (https://www.spandidos-publications.com/8661/downloadSupplementary)
Supplement: Supplementary file 1 [file downloadSupplementary]

## Sheet: Sheet1
Table SVI. Multi-effect analysis results.
id.exposure	id.outcome	outcome	exposure	egger_intercept	se	pval
data.txt	data.txt	data.txt	data.txt	data.txt	data.txt	data.txt
fJCrI3	renal_carcinoma	outcome	cg07431106	-0.0126943883656459	0.0237662161536241	0.609783472102685
LRucJA	renal_carcinoma	outcome	SeqId_17161_1	0.440254795271892	1.11704374414374	0.760992928592222
4Rffun	renal_carcinoma	outcome	SeqId_3448_13
ZTeVw3	renal_carcinoma	outcome	SeqId_4125_52	-0.000967765645954929	0.0569623352943416	0.986919039927861
LYjIgy	renal_carcinoma	outcome	cg08884395	0.0445676697127144	0.0220470474266696	0.0829489837937559
MUjuf5	renal_carcinoma	outcome	cg12446953	0.011572738614095	0.048572072265373	0.823387984942633
UcHTKP	renal_carcinoma	outcome	ENSG00000008710	-0.00801116204694768	0.0273696627569256	0.773511578547056
